# Supplementary material
Source: MDPI journal article supplement (https://www.mdpi.com/2073-4433/15/5/561)
Supplement: s1 [file s1]

Archive with 2 entries (2 files):
- Sample Locations and Descriptions (Table S1).pdf
- SEM EDX Raw Data (Table S2).pdf
